# Supplementary material
Source: PubMed Central journal article supplement (PMC4041152)
Supplement: NIHMS586433-supplement-01.pdf [file NIHMS586433-supplement-01.pdf]

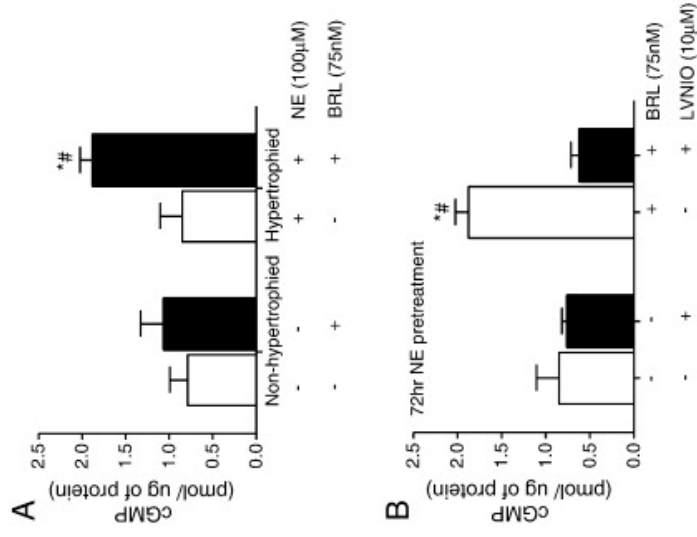

Fig. S1 BRL and induced cGMP via an nNOS-dependent mechanism. Cells were stimulated for 45 min with BRL in the presence or absence of 72 h NE pretreatment, or LVNIO, nNOS inhibitor. cGMP was measured in A) non-hypertrophied and hypertrophied cells and B) h...

Vabren L. Watts , Fernando M. Sepulveda , Oscar H. Cingolani , Alice S. Ho , Xiaolin Niu , Rosa Kim , Karen L. Mi...

**Anti-hypertrophic and anti-oxidant effect of beta3-adrenergic stimulation in myocytes requires differential neuronal NOS phosphorylation**

Journal of Molecular and Cellular Cardiology, Volume 62, 2013, 8 - 17

<http://dx.doi.org/10.1016/j.yjmcc.2013.04.025>
